# Supplementary material for: Glucose oxidase stabilized fluorescent gold nanoparticles as an ideal sensor matrix for dual mode sensing of glucose
Source: Royal Society of Chemistry journal article supplement (doi:10.1039/c5ra22477b), 2016-01-01
Supplement: c5ra22477b1.pdf [file c5ra22477b1.pdf]

## **Electronic Supplementary Information:**

### **Glucose Oxidase Stabilized Fluorescent Gold Nanoparticles as an Ideal Sensor Matrix for Dual Mode Sensing of Glucose**

**A. Muthurasu<sup>1,2</sup> and V. Ganesh<sup>1,2,\*</sup>**

<sup>1</sup> *Electrodics and Electrocatalysis (EEC) Division, CSIR – Central Electrochemical Research Institute (CSIR – CECRI), Karaikudi – 630003, Tamilnadu, India.*

<sup>2</sup> *Academy of Scientific and Innovative Research (AcSIR), New Delhi – 110025, India.*

*Tel: +91-4565-241242; Fax: +91-4565-227779.*

*Corresponding Author's E-mail: [vganesh@cecri.res.in](mailto:vganesh@cecri.res.in) (or) [ganelectro@gmail.com](mailto:ganelectro@gmail.com)*

#### **Determination of Quantum Yield (QY)**

Upon treatment with acid, GOx stabilized Au NPs result in the formation of tiny particles that exhibits strong fluorescence behaviour. GOx – FL Au NPs on exposure to UV light (365 nm) emits a yellowish green fluorescence. Quantum Yield (QY) of such fluorescent material is measured using Rhodamine B in water as a standard solution. Quantum yield of GOx – FL Au NPs in water is calculated using the following equation:

$$\Phi = \Phi_{st} (I_x/I_{st}) (\eta^2/\eta_{st}^2) (A_{st}/A_x)$$

Where  $\Phi$  is the quantum yield,  $\Phi_{st}$  is the standard quantum yield,  $I_x$  is the measured integrated emission intensity,  $I_{st}$  measured emission intensity for standard solution,  $\eta$  is the refractive index (1.33 for water), and  $A_x$  is the optical density of the sample and  $A_{st}$  is optical density of the standard sample. Here standard sample, the reference fluorophore of Rhodamine B in water has a known QY of 0.31. In our case, QY of GOx – FL Au NPs is determined to be 5%.

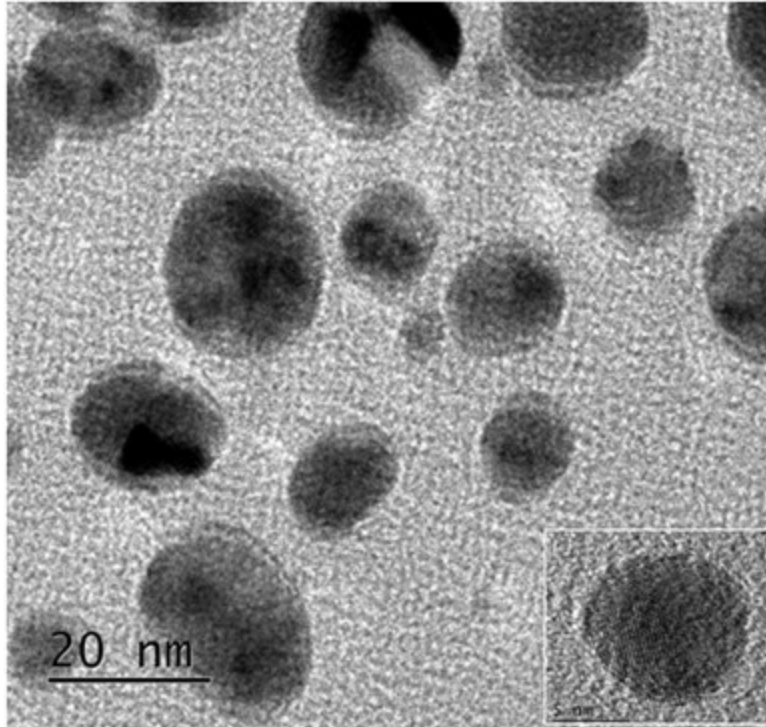

**Figure S1.** TEM image of GOx stabilized FL Au NPs and inset displays a lattice fringe pattern formation.

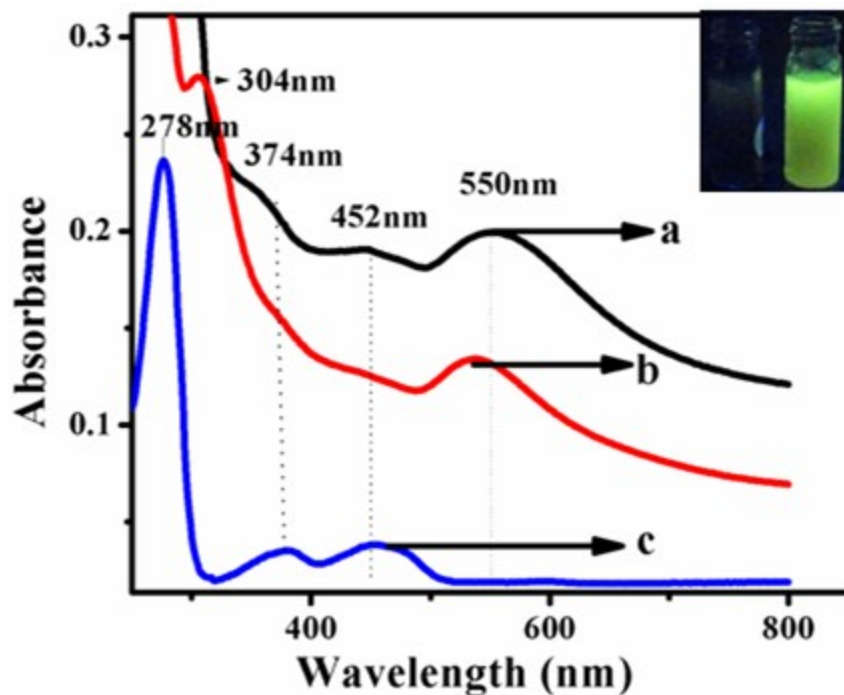

**Figure S2.** UV-Vis spectra of (a) as-prepared GOx – Au NPs (black line), (b) GOx – FL Au NPs (red line) and (c) the enzyme, GOx alone in PBS (pH = 7.0) buffer solution. Inset: Photograph of UV irradiated GOx – Au NPs solution before and after the acid treatment, exhibiting a bright yellowish green fluorescence in the case GOx – FL Au NPs.

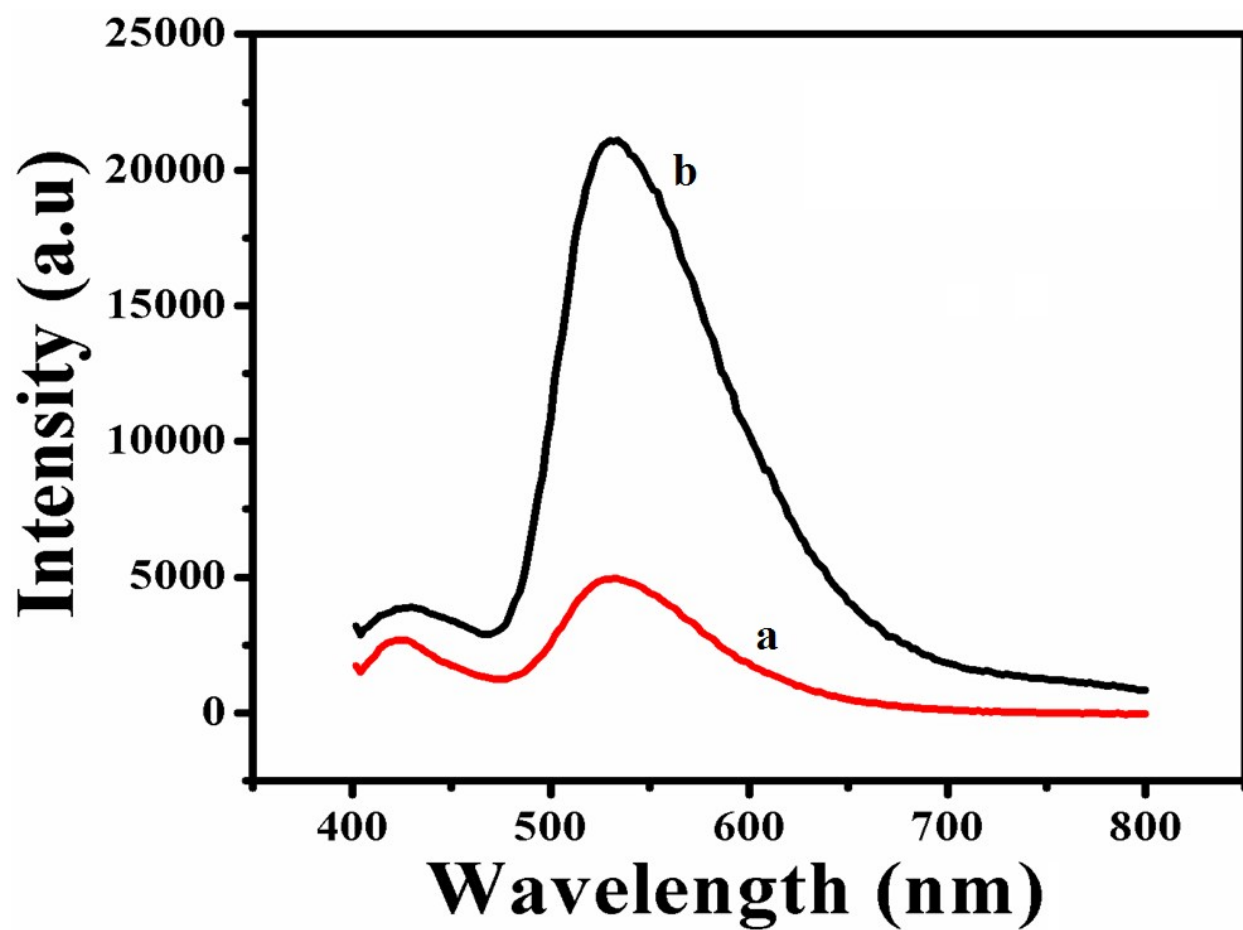

**Figure S3.** PL emission spectra recorded at an excitation wavelength of 360 nm for the enzyme, GOx alone (a) and GOx stabilized FL Au NPs (b).

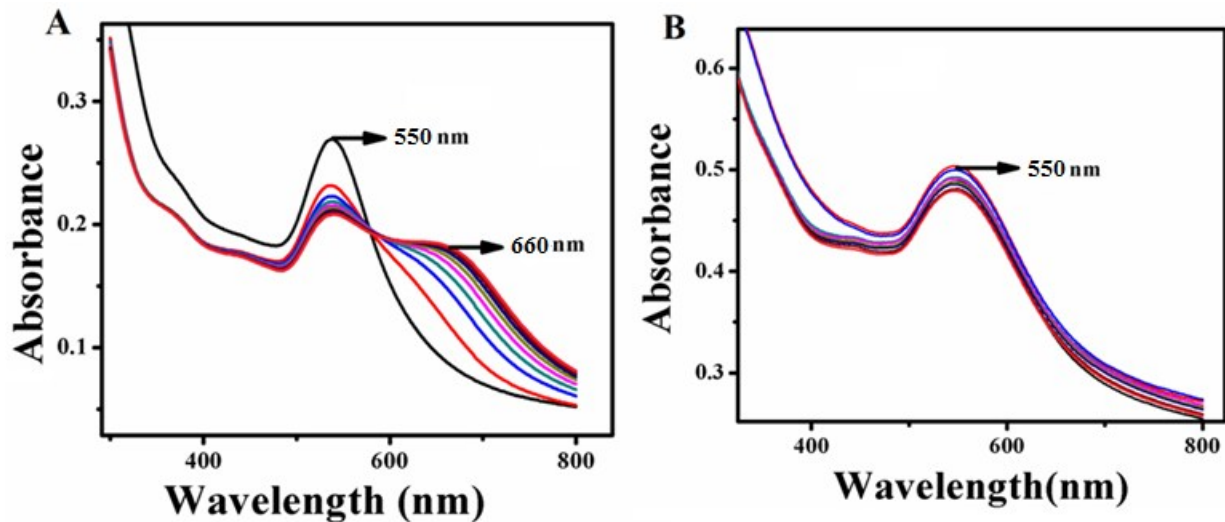

**Figure S4.** UV – Vis spectra of GOx stabilized FL Au NPs (A) and GOx – Au NPs (B) for the addition of various concentrations of cysteine.

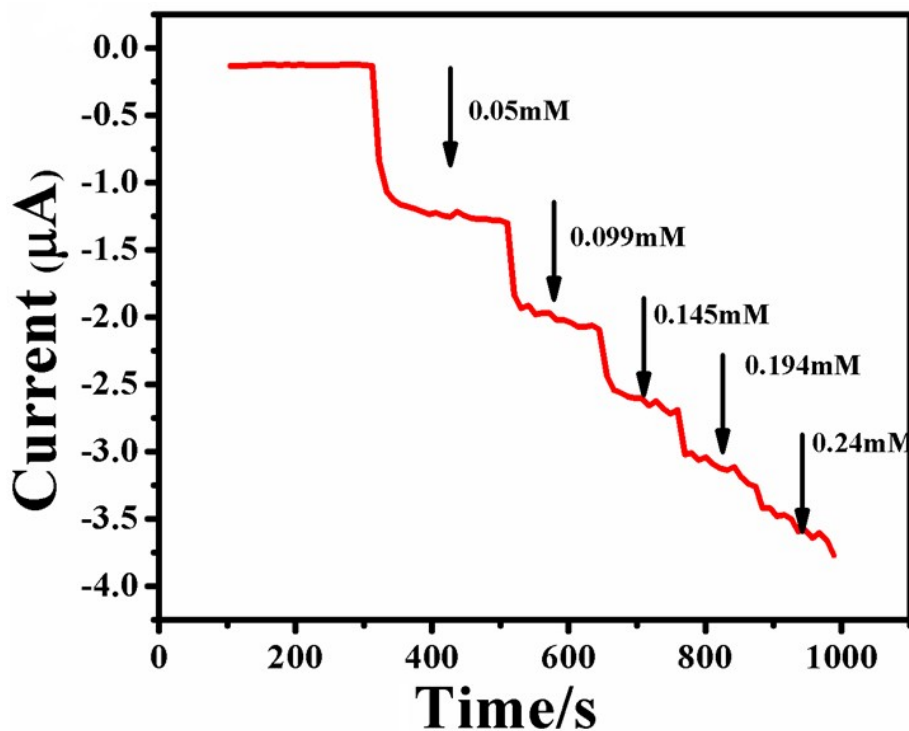

**Figure S5.** Chronoamperometric (*i* vs. *t* plot) response corresponding to various concentrations of glucose addition onto GOx – Au NPs modified GC electrode in PBS (pH = 7.0) buffer solution under  $\text{N}_2$  atmosphere.

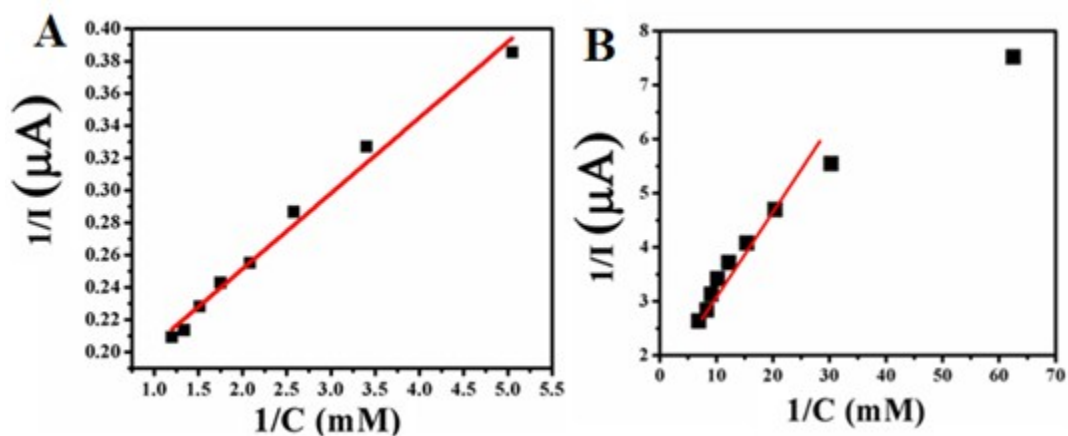

**Figure S6.** Lineweaver – Burk plot of GOx – Au NPs (A) and GOx – FL Au NPs (B) modified GC electrode for glucose addition. Data points were obtained from Fig. 6B and Fig. 7B respectively.
